# Supplementary material
Source: PubMed Central journal article supplement (PMC3551985)
Supplement: NIHMS418913-supplement-1.pdf [file NIHMS418913-supplement-1.pdf]

Supplementary Information

for

**Allosteric regulation of DegS protease subunits through a shared energy landscape**

Randall V. Mauldin and Robert T. Sauer

Department of Biology  
Massachusetts Institute of Technology,  
Cambridge, MA 02139, USA.

Address correspondence to [bobsauer@mit.edu](mailto:bobsauer@mit.edu).

## Supplementary Results

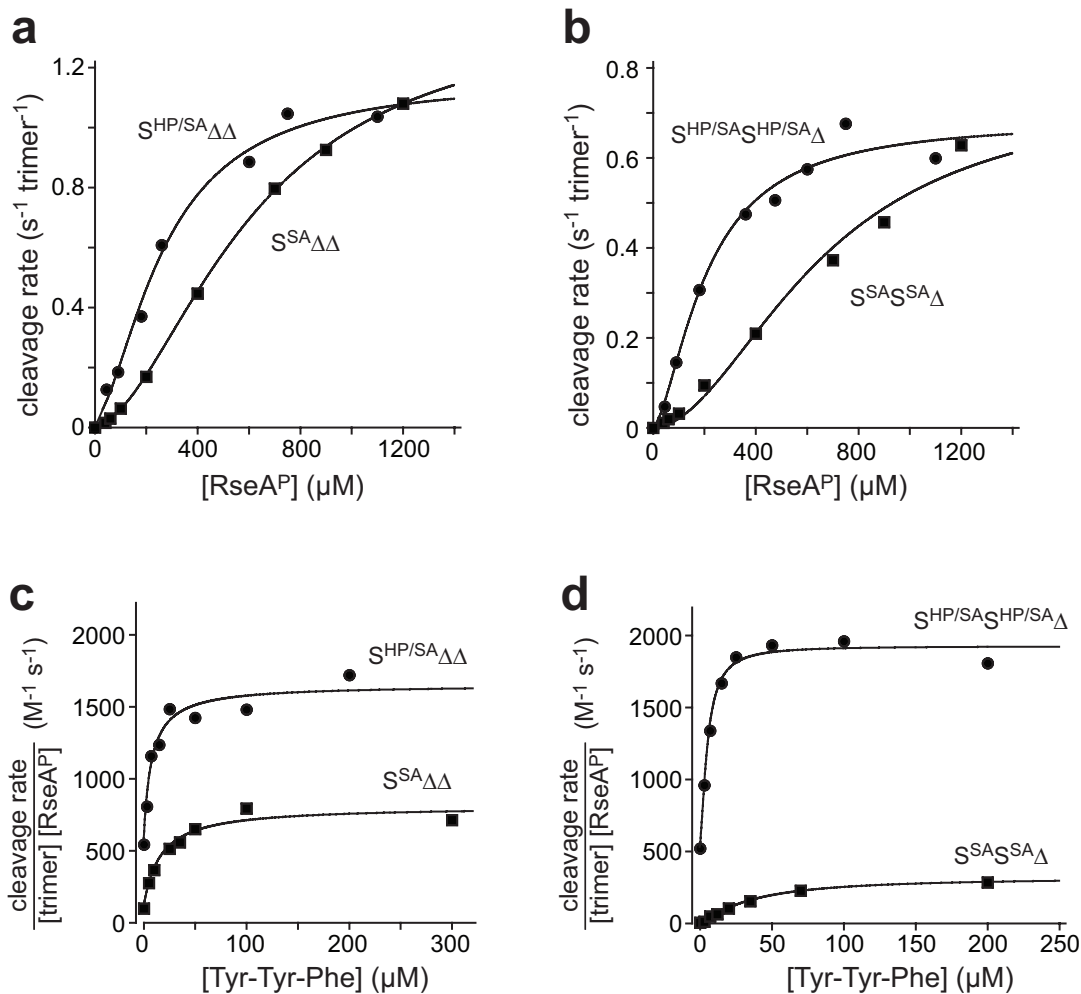

**Supplementary Figure 1.** The His198-Pro mutation (HP) stabilizes the active conformation of neighboring subunits. **(a,b)** Michaelis-Menten plots for  $\text{RseA}^{\text{P}}$  cleavage by hybrid trimers ( $0.6 \mu\text{M}$ ) containing the HP mutation in catalytically inactive  $\text{S}^{\text{SA}}$  subunits compared to otherwise isogenic trimers lacking the HP mutation. Experiments contained  $150 \mu\text{M}$  Tyr-Tyr-Phe tripeptide. The lines are fits to the Hill equation, but fitting errors were too large to allow confident determination of parameters. **(c,d)** Tyr-Tyr-Phe tripeptide activation of  $\text{RseA}^{\text{P}}$  ( $200 \mu\text{M}$ ) cleavage by  $0.6 \mu\text{M}$  concentrations of mixed trimers. Panel-c data were fitted to a hyperbolic equation,  $\text{rate} = \text{basal} + V_{\text{max}} \cdot [\text{Tyr-Tyr-Phe}] / (K_{\text{act}} + [\text{Tyr-Tyr-Phe}])$ . Panel-d data were fitted to a Hill equation,  $\text{rate} = \text{basal} + V_{\text{max}} \cdot [\text{Tyr-Tyr-Phe}]^n / (K_{\text{act}}^n + [\text{Tyr-Tyr-Phe}]^n)$ . Fitted parameters are listed in Table 1.

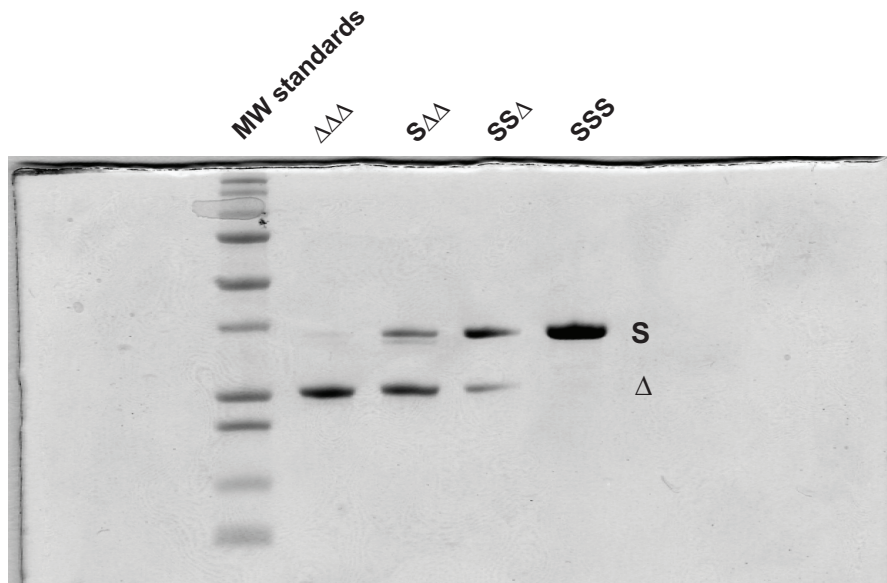

**Supplementary Figure 2.** Coomassie-blue stained SDS-PAGE gel from which the segment shown in Fig. 1c was taken.

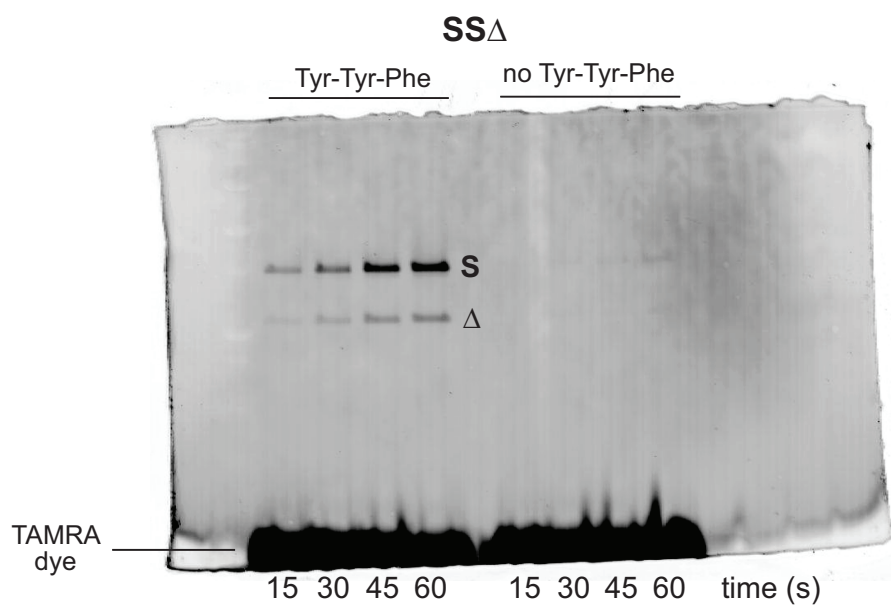

**Supplementary Figure 3.** Fluorescence image of SDS-PAGE gel from which the segment shown in Fig. 3a was taken. The intense band at the bottom is unreacted or hydrolyzed TAMRA-FP reagent.

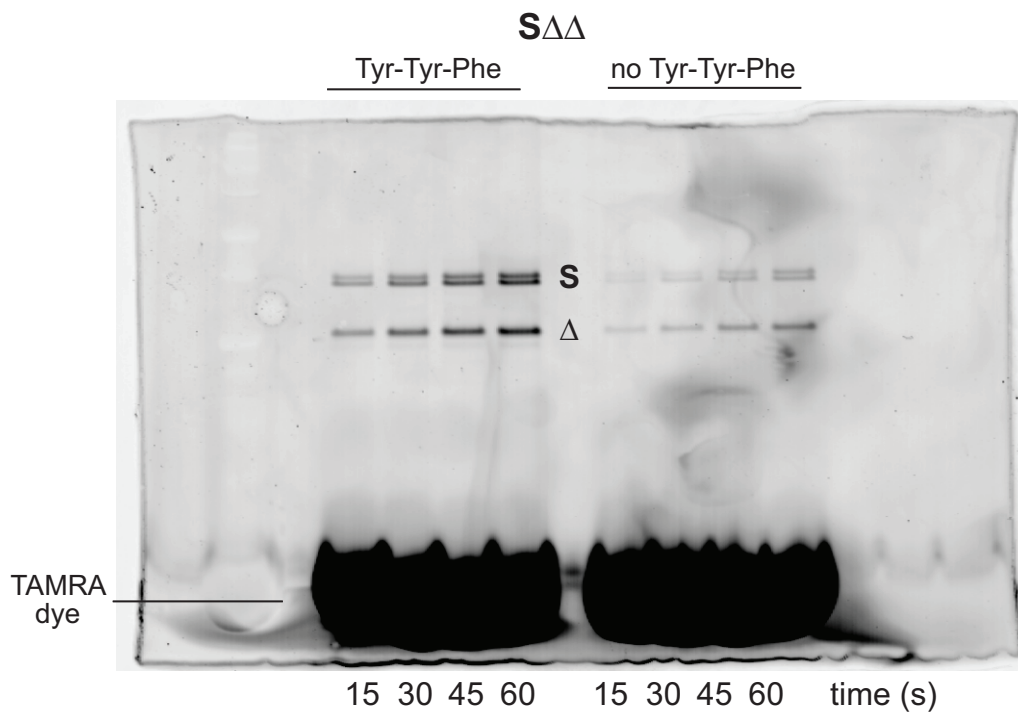

**Supplementary Figure 4.** Fluorescence image of SDS-PAGE gel from which the segment shown in Fig. 3b was taken. The intense band at the bottom is unreacted or hydrolyzed TAMRA-FP reagent.

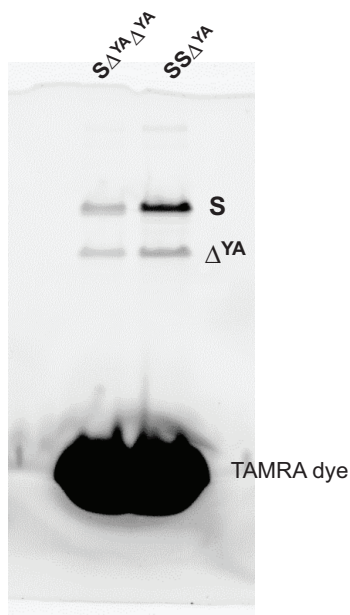

**Supplementary Figure 5.** Fluorescence image of the complete lanes of the SDS-PAGE gel from which the segment shown in Fig. 4c was taken. The intense band at the bottom is unreacted or hydrolyzed TAMRA-FP reagent.
